# Supplementary material for: Point prevalence of non-melanoma and melanoma skin cancers in Australian surfers and swimmers in Southeast Queensland and Northern New South Wales
Source: PeerJ. 2022 Apr 28;10:e13243. doi: 10.7717/peerj.13243 (PMC9057286; doi:10.7717/peerj.13243)
Supplement: Supplemental Information 1 [file peerj-10-13243-s001.xlsx]

## Sheet: Sheet1
		Scalp		Nose		Face		lip		Ear		neck		Shoulder		Chest		Arm		Back		Hand		Up leg		Lower leg		foot		Totals	as a %										Group	% Peak UV ACTIVITY		Any prevention strategy		Activity	Liftime aquatic hrs per year
Surfers (n=116)	Actinic Keratosis	5	0.714286	3	0.5	30	0.810811	0	0	2	0.333333	7	0.875	0	0	1	0.25	3	0.1875	0	0	8	0.8	0	0	0	0	0	0	59	44.697										1	85		1		1	39000
	BCC	1	0.142857	1	0.166667	3	0.0810811	0	0	0	0	1	0.125	2	0.4	2	0.5	7	0.4375	13	0.8125	0	0	1	0.333333	1	0.111111	0	0	32	24.2424										1	25		1		1	2500
	SCC Insi tu	1	0.142857	1	0.166667	0	0	2	1	2	0.333333	0	0	3	0.6	0	0	2	0.125	0	0	2	0.2	2	0.666667	7	0.777778	2	0.666667	24	18.1818										1	30		1		1	11250
	SCC	0	0	1	0.166667	2	0.0540541	0	0	2	0.333333	0	0	0	0	0	0	3	0.1875	1	0.0625	0	0	0	0	1	0.111111	1	0.333333	11	8.33333										1	20		1		1	2400
	Malanoma	0	0	0	0	2	0.0540541	0	0	0	0	0	0	0	0	1	0.25	1	0.0625	2	0.125	0	0	0	0	0	0	0	0	6	4.54545										1	25		1		1	5474
		7		6		37		2		6		8		5		4		16		16		10		3		9		3		132		0.109657						t-test			2	10		1		1	4000
		5.30303		4.54545		28.0303		1.51515		4.54545		6.06061		3.78788		3.0303		12.1212		12.1212		7.57576		2.27273		6.81818	0	2.27273										#DIV/0!			1	5		1		1	10920
Swimmers (n=55)	Actinic Keratosis	3	1	0	0	7	0.777778	0	0	0	0	1	0.5	0	0	1	0.5	1	0.125	0	0	2	0.666667	0	0	0	0	0	0	15	11.3636										1	20		1		1	3200
	BCC	0	0	0	0	2	0.222222	0	0	0	0	1	0.5	0	0	0	0	1	0.125	3	0.6	0	0	1	0.5	1	0.125	1	0.5	10	7.57576										1	30		1		1	1200
	SCC Insi tu	0	0	3	1	0	0	0	0	2	1	0	0	3	1	1	0.5	4	0.5	0	0	1	0.333333	1	0.5	6	0.75	1	0.5	22	16.6667										2			1		1	2080
	SCC	0	0	0	0	0	0	0	0	0	0	0	0	0	0	0	0	2	0.25	1	0.2	0	0	0	0	1	0.125	0	0	4	3.0303										2	10		1		1	1200
	Malanoma	0	0	0	0	0	0	0	0	0	0	0	0	0	0	0	0	0	0	1	0.2	0	0	0	0	0	0	0	0	1	0.757576										1	30		1		1	10530
		3		3		9		0		2		2		3		2		8		5		3		2		8		2		52											1	20		1		1	6240
	Total	10		9		46		2		8		10		8		6		24		21		13		5		17		5								Actinic K Surf	Actinic K Swim				1	30		1		1	10296
		5.76923		5.76923		17.3077		0		3.84615		3.84615		5.76923		3.84615		15.3846		9.61538		5.76923		3.84615		15.3846		3.84615								5	3				1	60		1		1	6750
	Grand total (both cohorts)	% of all Skin cancers		% of all participants (n=171)												BCC Surf	BCC swim			Ak Surf	AK swim				Melanoma Surf	Melanoma Swim			SCC insitu Surf	Scc Insitu Swim						3	0	0.0760108			2	50		1		1	2600
AK	74	0.402174		0.432749		Rates per 100,000						Aus Population	Surf OR	Swim OR		1	0			5	3				2	0			0	0						30	7				2			1		1	1100
BCC	42	0.228261		0.245614			Surf	Swim		OR						1	0			3	0				0	0			2	0						0	0				1	30		1		1	240
SCC in situ	46	0.25		0.269006		AK	50862.1	27272.7		1.86494		1541	33.0059	17.6981		3	2			30	7				0	0			2	2						2	0				1	70		1		1	36036
SCC	15	0.0815217		0.0877193		BCC	27586.2	18181.8		1.51724						0	0			0	0				0	0			0	0						7	1				1	40		1		1	5600
Melanmoa	7	0.0380435		0.0409357		SCC in situ	20689.7	27272.7		1.31818	switched					0	0			2	0				0	0			3	3						0	0				1	80		1		1	1040
	184			171 total participants		SCC	9482.76	7272.73		1.30388		1035	9.16209	7.02679		1	1	0.0679825		7	1	0.0760108			1	0	0.136812		0	1	0.429271					1	1				1	15		1		1	3675
						Melanoma	5172.41	1818.18		2.84483		53.5	96.6806	33.9847		2	0			0	0				1	0			2	4						3	1				2	100		1		1	720
		5.3														2	0			1	1				2	0			0	0						0	0				1	50		1		1	1500
		0.0588235				Rates combined										7	1			3	1				0	0			2	1						8	2				1			1		1	40000
						AK	43274.9									13	3			0	0				0	1			2	1						0	0				2	100		1		1	1500
						BCC	24561.4		1541	15.9386			15.9386			0	0			8	2				0	0			7	6						0	0				1	20		1		1	2500
						SCC in situ	26900.6									1	1			0	0				0	0			2	1						0	0				1	90		1		1	18720
						SCC	8771.93		1035	8.47529			8.47529			1	1			0	0				0	0															2	100		1		1	13000
						Melanoma	4093.57		53.5	76.5153			76.5153			0	1			0	0								SCc surf	SCC Swim						BCC Surf	BCC Swim				1	20		1		1	4550
																													2	0						1	0				1	40		1		1	1040
																													0	0	0.0526631					1	0	0.0679825			1			1		1	800
																													2	0						3	2				2	35		1		1	7800
		total exposure surf		1024800																									0	0						0	0				1	50		1		1	3600
		total exposure swim		369730																									0	0						0	0				2	50		1		1	4160
																													0	0						1	1				1	50		1		1	45500
																													3	2						2	0				2	20		1		1	9000
																													1	1						2	0				1	10		1		1	16640
																													0	0						7	1				1	50		1		1	4800
																													0	0						13	3				2	20		1		1	20160
																													1	1						0	0				2	75		1		1	1200
																													1	0						1	1				2	50		1		1	32400
																																				1	1				2	60		1		1	7740
																																				0	1				2	50		1		1	5000
																																									2			1		1	22440
																																									2	25		1		1	21000
																																									2	5		0		1	6000
																																									2			1		1	3300
																																									2	55		0		1	104
																																									2			1		1	4680
																																									1	60		1		1	1872
																																									1			1		1	15600
																																									1	30		1		1	563
																																									1	10		1		1	4992
																																									2	50		1		1	364
																																									1	30		1		1	240
																																									2	10		1		1	8400
																																									2	90		1		1	3900
																																									1	20		1		1	2275
																																									1	50		1		1	1560
																																									1	20		1		1	31200
																																									2	40		1		1	6000
																																									2	100		1		1	2200
																																									1	30		1		1	4914
																																									1			1		1	17888
																																									1	27		1		1	19500
																																									1			1		1	3640
																																									1	50		1		1	5400
																																									1			1		1	15600
																																									1	30		1		1	3360
																																									2	30		0		1	2400
																																									1	8		1		1	9776
																																									2			1		1	6000
																																									1	20		1		1	640
																																									1	55		1		1	20592
																																									1	85		1		1	960
																																									2			1		1	700
																																									1	25		1		1	4800
																																									1	30		1		1	39312
																																									2	50		1		1	3000
																																									1	20		1		1	12480
																																									1	50		1		1	45500
																																									1	30		1		1	17500
																																									2	80		1		1	1200
																																									1	50		1		1	160
																																									1	80		1		1	8400
																																									1	80		1		1	10400
																																									1	70		1		1	4500
																																									2	70		1		1	7072
																																									1	20		1		1	12000
																																									1	25		1		1	11700
																																									1	75		1		1	1800
																																									2			1		1	10400
																																									1	25		1		1	1575
																																									1	75		1		1	450
																																									2	20		0		1	10400
																																									1	25		1		1	1600
																																									1	20		1		1	2000
																																									1	10		1		1	12500
																																									1	30		1		1	4800
																																									1	10		1		1	6400
																																									1	25		1		1	1040
																																									1			1		1	1944
																																									2	10		1		1	1040
																																									1	60		1		1	15188
																																									2	50		1		1	2520
																																									1	20		1		1	420
																																									2	33		1		1	1248
																																									2	15		1		1	51450
																																									2	100		1		1	182
																																									2	30		1		1	180
																																									1	85		1		1	8190
																																									1	60		1		1	1000
																																									1			1		1	15600
																																									1	40		1		1	3150
																																			#N/A						2	20		1		1	2496
																																									2	20		1		2	1248
																																									1	80		1		2	12000
																																									2	20		1		2	7800
																																									1	90		1		2	3250
																																									1	90		1		2	1300
																																									1	60		1		2	672
																																									2	65		1		2	1440
																																									2			1		2	4680
																																									1	50		1		2	30000
																																									1	25		1		2	2188
																																									2			1		2	3600
																																									1	40		1		2	3120
																																									1	99		1		2	1750
																																									1	80		1		2	2400
																																									1	30		1		2	1920
																																									1	30		1		2	1680
																																									1	80		1		2	10400
																																									1	50		1		2	320
																																									1	20		1		2	16640
																																									1	20		1		2	14400
																																									1	63		1		2	35100
																																									2	25		1		2	6400
																																									1			1		2	5000
																																									1	80		1		2	3600
																																									2	80		1		2	520
																																									1	80		1		2	13824
																																									2	33		1		2	1560
																																									1	10		1		2	18330
																																									1	90		1		2	4914
																																									1	5		1		2	12480
																																									1	20		1		2	5250
																																									1	30		1		2	2400
																																									1	30		1		2	5180
																																									1	90		1		2	6240
																																									2	50		1		2	5280
																																									1	99		1		2	27300
																																									1	50		1		2	6552
																																									1	30		1		2	2500
																																									1	100		1		2	300
																																									2	80		1		2	5950
																																									1	20		1		2	4576
																																									1	50		1		2	2700
																																									1	40		1		2	3900
																																									2	10		1		2	21240
																																									1	7		1		2	1768
																																									2	15		1		2	1800
																																									1	20		1		2	13104
																																									1	30		1		2	5750
																																									2	17		1		2	7800
																																									1	70		1		2	15400
																																									1	13		1		2	9568
																																									1	10		1		2	3000
																																									1	50		1		2	14040
																																									1			1		2	20800
																																									1	50		1		2	13000
[truncated: 3 more columns]
