# Supplementary material for: Point prevalence of non-melanoma and melanoma skin cancers in Australian surfers and swimmers in Southeast Queensland and Northern New South Wales
Source: PeerJ. 2022 Apr 28;10:e13243. doi: 10.7717/peerj.13243 (PMC9057286; doi:10.7717/peerj.13243)
Supplement: Supplemental Information 2 [file peerj-10-13243-s002.xlsx]

## Sheet: Sheet1
Experience in years				Weeks per year			Hours per week			total hrs per year					Activity during peak UV (what %)			Activity completed during Peak UVR Yes/No
65				50			12			600		39000			85			1
5				50			10			500		2500			25			1
20				45			12.5			562.5		11250			30			1
20				24			5			120		2400			20			1
34				46			3.5			161		5474			25			1
40				50			2			100		4000			10			1
65				56			3			168		10920			5			1
20				40			4			160		3200			20			1
12				50			2			100		1200			30			1
20				52			2			104		2080						0
30				20			2			40		1200			10			1
15				52			13.5			702		10530			30			1
20				52			6			312		6240			20			1
33				52			6			312		10296			30			1
45				50			3			150		6750			60			1
25				52			2			104		2600			50			1
44				25			1			25		1100						0
3				40			2			80		240			30			1
33				52			21			1092		36036			70			1
14				50			8			400		5600			40			1
2				52			10			520		1040			80			1
35				35			3			105		3675			15			1
5				48			3			144		720			100			1
30				5			10			50		1500			50			1
50				50			16			800		40000						0
15				20			5			100		1500			100			1
10				25			10			250		2500			20			1
48				52			7.5			390		18720			90			1
26				50			10			500		13000			100			1
7				52			12.5			650		4550			20			1
26				20			2			40		1040			40			1
2				40			10			400		800						0
15				52			10			520		7800			35			1
40				30			3			90		3600			50			1
40				26			4			104		4160			50			1
50				52			17.5			910		45500			50			1
9				50			20			1000		9000			20			1
40				52			8			416		16640			10			1
40				30			4			120		4800			50			1
60				48			7			336		20160			20			1
40				10			3			30		1200			75			1
60				36			15			540		32400			50			1
43				40			4.5			180		7740			60			1
50				20			5			100		5000			50			1
55				51			8			408		22440						1
35				50			12			600		21000			25			1
50				40			3			120		6000			5			1
22				50			3			150		3300						0
4				26			1			26		104			55			1
65				36			2			72		4680						0
3				52			12			624		1872			60			1
50				52			6			312		15600						0
1.5				50			7.5			375		562.5			30			1
16				52			6			312		4992			10			1
14				26			1			26		364			50			1
3				40			2			80		240			30			1
40				30			7			210		8400			10			1
15				26			10			260		3900			90			1
7				50			6.5			325		2275			20			1
20				52			1.5			78		1560			50			1
40				52			15			780		31200			20			1
30				25			8			200		6000			40			1
55				20			2			40		2200			100			1
42				39			3			117		4914			30			1
43				52			8			416		17888						0
50				52			7.5			390		19500			27			1
13				40			7			280		3640						0
24				45			5			225		5400			50			1
30				52			10			520		15600						0
14				40			6			240		3360			30			1
24				50			2			100		2400			30			1
47				52			4			208		9776			8			1
30				50			4			200		6000						0
4				40			4			160		640			20			1
44				52			9			468		20592			55			1
8				48			2.5			120		960			85			1
3.5				40			5			200		700						0
12				50			8			400		4800			25			1
63				52			12			624		39312			30			1
25				40			3			120		3000			50			1
30				52			8			416		12480			20			1
50				52			17.5			910		45500			50			1
35				50			10			500		17500			30			1
20				20			3			60		1200			80			1
2				20			4			80		160			50			1
30				40			7			280		8400			80			1
25				52			8			416		10400			80			1
20				45			5			225		4500			70			1
34				52			4			208		7072			70			1
40				50			6			300		12000			20			1
30				52			7.5			390		11700			25			1
20				30			3			90		1800			75			1
50				52			4			208		10400						0
35				15			3			45		1575			25			0
30				3			5			15		450			75			1
50				52			4			208		10400			20			1
10				40			4			160		1600			25			1
20				25			4			100		2000			20			1
50				25			10			250		12500			10			1
40				40			3			120		4800			30			1
40				40			4			160		6400			10			1
5				26			8			208		1040			25			1
9				48			4.5			216		1944						0
5				52			4			208		1040			10			1
45				45			7.5			337.5		15187.5			60			1
15				24			7			168		2520			50			1
6				20			3.5			70		420			20			1
8				52			3			156		1248			33			1
30				49			35			1715		51450			15			1
1				26			7			182		182			100			1
1				45			4			180		180			30			1
35				52			4.5			234		8190			85			1
5				40			5			200		1000			60			1
30				52			10			520		15600						0
14				45			5			225		3150			40			1
8				52			6			312		2496			20			1
8				52			3			156		1248			20			1
40				50			6			300		12000			80			1
10				52			15			780		7800			20
10				50			6.5			325		3250			90			1
4				50			6.5			325		1300			90			1
2				48			7			336		672			60			1
20				18			4			72		1440			65			1
30				52			3			156		4680						0
30				50			20			1000		30000			50			1
25				35			2.5			87.5		2187.5			25			1
45				40			2			80		3600						0
10				52			6			312		3120			40			1
5				35			10			350		1750			99			1
30				40			2			80		2400			80			1
10				48			4			192		1920			30			1
10				42			4			168		1680			30			1
40				52			5			260		10400			80			1
2				40			4			160		320			50			1
32				52			10			520		16640			20			1
40				36			10			360		14400			20			1
45				52			15			780		35100			63			1
40				40			4			160		6400			25			1
50				50			2			100		5000						0
5				40			18			720		3600			80			1
5				52			2			104		520			80			1
24				48			12			576		13824			80			1
20				26			3			78		1560			33			1
47				52			7.5			390		18330			10			1
27				52			3.5			182		4914			90			1
40				52			6			312		12480			5			1
30				50			3.5			175		5250			20			1
12				50			4			200		2400			30			1
37				40			3.5			140		5180			30			1
15				52			8			416		6240			90			1
22				40			6			240		5280			50			1
21				52			25			1300		27300			99			1
18				52			7			364		6552			50			1
20				25			5			125		2500			30			1
1				25			12			300		300			100			1
17				50			7			350		5950			80			1
22				52			4			208		4576			20			1
10				45			6			270		2700			50			1
15				52			5			260		3900			40			1
59				45			8			360		21240			10			1
17				52			2			104		1768			7			1
3				40			15			600		1800			15			1
18				52			14			728		13104			20			1
23				50			5			250		5750			30			1
50				52			3			156		7800			17			1
22				50			14			700		15400			70			1
23				52			8			416		9568			13			1
25				20			6			120		3000			10			1
45				52			6			312		14040			50			1
40				52			10			520		20800						0
50				40			6.5			260		13000			50			1
